# Supplementary material for: On Predicting Animal Evolution
Source: Preprints.org preprint supplement (doi:10.20944/preprints201806.0356.v3), 2018-09-17
Supplement: Supplementary file 2 [file supplementary]

Annexes 1 and 2, in: On predicting animal evolution, by Stuart P. Norman.

Annex 1. Two south-central Afr savanna woodland sites: species names.

Below are given the specific names upon which the generic names that appear in the left-hand column and in Annex 2 are based. All the known naturally occurring species are listed, except for: non-breeding migrants, vagrants from other habitats, and residents that do not qualify for trophic reasons (Annex 2; see Ecological note).

**Primary producer tier,** woody plants (trees, shrubs, subshrubs, climbers) (numerous orders and families)

|  | Both sites | 0.5ha site only | 26ha site only |
| --- | --- | --- | --- |
| *Adenia* | *digitata* (Harv.) Engl. |  |  |
| *Afzelia* | *quanzensis* Welw. |  |  |
| *Allophylus* |  | *africanus* P.Beauv. | *rubifolius* (Hochst. ex A.Rich.) Engl. |
| *Bauhinia* |  | *macrantha* Oliv. | *petersiana* Bolle |
| *Brachystegia* |  | *spiciformis* Benth. | *boehmii* Taub. |
| *Combretum* | *collinum* Fresen, *zeyheri* Sond. | *psidioides* Welw. | *adenogonium* A.Rich., *apiculatum* Sond., *hereroense* Schinz, *imberbe* Wawra, *molle* R.Br., *mossambicense* (Klotzsch) Engl. |
| *Commiphora* | *glandulosa* Schinz, *mossambicensis* (Oliv.) Engl. |  | *africana* (A.Rich.) Engl., *edulis* (Klotzsch) Engl., *mollis* (Oliv.) Engl. |
| *Diplorhynchus* | *condylocarpon* (Müll.Arg.) Pichon |  |  |
| *Friesodielsia* | *obovata* (Benth.) Verdc. |  |  |
| *Grewia* | *flavescens* Juss., *monticola* Sond. |  | *bicolor* Juss., *herbacea* Welw. ex Hiern, *praecox* K.Schum., *subspathulata* N.E.Br. |
| *Lannea* | *discolor* (Sond.) Engl. |  | *edulis* (Sond.) Engl. |
| *Melhania* | *acuminata* Mast. |  |  |
| *Pavetta* | *schumanniana* F.Hoffm. |  | *gardeniifolia* A.Rich. |
| *Pseudolachnostylis* | *maprouneifolia* Pax |  |  |
| *Pterocarpus* |  | *angolensis* DC. | *rotundifolius* (Sond.) Druce |
| *Rhus* |  | *tenuinervis* Engl. | *lucens* Hutch. |
| *Rhynchosia* |  | *stipitata* Verdc. | *buchananii* Harms |
| *Rotheca* |  | *myricoides* (Hochst.) Steane & Mabb. | *wildii* (Moldenke) R.Fern. |
| *Senegalia* | *polyacantha* (Willd.) Seigler & Ebinger |  | *ataxacantha* (DC.) Kyal. & Boatwr., *erubescens* (Oliv.) Kyal. & Boatwr., *goetzei* (Harms) Kyal. & Boatwr., *nigrescens* (Oliv.) P.J.H.Hurter |
| *Steganotaenia* | *araliacea* Hochst. |  |  |
| *Strychnos* |  | *cocculoides* Bak., *pungens* Solered. | *innocua* Del., *potatorum* L.f., *spinosa* Lam. |
| *Terminalia* | *sericea* DC. | *brachystemma* Hiern | *randii* Bak.f., *stenostachya* Engl. & Diels, *stuhlmannii* Engl. |
| *Vachellia* | *sieberiana* (DC.) Kyal. & Boatwr. |  | *nilotica* P.J.H.Hurter & Mabb. |
| *Ximenia* | *caffra* Sond. |  | *americana* L. |
| *Baikiaea* |  | *plurijuga* Harms |  |
| *Baphia* |  | *massaiensis* Taub. |  |
| *Burkea* |  | *africana* Hook. |  |
| *Erythrophleum* |  | *africanum* (Benth.) Harms |  |
| *Ficus* |  | *thonningii* Blume |  |
| *Guibourtia* |  | *coleosperma* (Benth.) J.Léonard |  |
| *Hymenocardia* |  | *acida* Tul. |  |
| *Ochna* |  | *pulchra* Hook. |  |
| *Paropsia* |  | *brazzaeana* Baill. |  |
| *Psydrax* |  | *livida* (Hiern) Bridson |  |
| *Pygmaeothamnus* |  | *zeyheri* (Sond.) Robyns |  |
| *Schinziophyton* |  | *rautanenii* (Schinz) Radcl.-Sm. |  |
| *Securidaca* |  | *longepedunculata* Fresen |  |
| *Trichilia* |  | *emetica* Vahl |  |
| *Vitex* |  | *mombassae* Vatke |  |
| *Xylopia* |  | *odoratissima* Oliv. |  |
| *Abutilon* |  |  | *angulatum* (Guill. & Perr.) Mast., *ramosum* (Cav.) Guill. & Perr. |
| *Actinanthella* |  |  | *menyharthii* (Engl. & Schinz ex Schinz) Balle |
| *Agelanthus* |  |  | *sambesiacus* (Engl. & Schinz) Polh. & Wiens |
| *Albizia* |  |  | *brevifolia* Schinz, *tanganyicensis* Bak.f. |
| *Asparagus* |  |  | *africanus* Lam., *aspergillus* Jessop, *buchananii* Bak., *schroederi* Engl. |
| *Azanza* |  |  | *garckeana* (F.Hoffm.) Exell & Hillc. |
| *Barleria* |  |  | *kirkii* T.Anders., sp. indet. |
| *Berchemia* |  |  | *discolor* (Klotzsch) Hemsl. |
| *Bolusanthus* |  |  | *speciosus* (Bolus) Harms |
| *Boscia* |  |  | *angustifolia* A.Rich. |
| *Bridelia* |  |  | *cathartica* G.Bertol. |
| *Canthium* |  |  | *glaucum* Hiern |
| *Carphalea* |  |  | *pubescens* (Klotzsch) Verdc. |
| *Cassia* |  |  | *abbreviata* Oliv. |
| *Catunaregam* |  |  | *taylorii* (S.Moore) Bridson |
| *Cissus* |  |  | *cornifolia* (Bak.) Planch. |
| *Clerodendrum* |  |  | *ternatum* Schinz |
| *Colophospermum* |  |  | *mopane* (Benth.) J.Léonard |
| *Coptosperma* |  |  | *neurophyllum* (S.Moore) Degreef |
| *Crossopteryx* |  |  | *febrifuga* (G.Don.) Benth. |
| *Crotalaria* |  |  | *pallidicaulis* Harms |
| *Croton* |  |  | *gratissimus* Burch. |
| *Cryptolepis* |  |  | *oblongifolia* (Meisn.) Schltr. |
| *Dalbergia* |  |  | *melanoxylon* Guill. & Perr., *nitidula* Bak. |
| *Decorsea* |  |  | *schlecteri* (Harms) Verdc. |
| *Dichrostachys* |  |  | *cinerea* (L.) Wight & Arn. |
| *Diospyros* |  |  | *mespiliformis* A.DC., *quiloensis* (Hiern) F.White, *squarrosa* Klotzsch |
| *Duosperma* |  |  | *crenatum* (Lindau) P.G.Mey. |
| *Dyschoriste* |  |  | *hildebrandtii* (S.Moore) S.Moore |
| *Ehretia* |  |  | *amoena* Klotzsch |
| *Elephantorrhiza* |  |  | *goetzei* (Harms) Harms |
| *Erythrococca* |  |  | *menyharthii* (Pax) Prain |
| *Erythroxylum* |  |  | *zambesiacum* N.Robson |
| *Euclea* |  |  | *divinorum* Hiern |
| *Euphorbia* |  |  | *espinosa* Pax |
| *Feretia* |  |  | *aeruginescens* Stapf. |
| *Flacourtia* |  |  | *indica* (Burm.f.) Merr. |
| *Flueggia* |  |  | *virosa* (Roxb. ex Willd.) Voigt |
| *Gardenia* |  |  | *resiniflua* Hiern, *subacaulis* Stapf. & Hutch., *ternifolia* K.Schum. & Thonn. |
| *Gymnosporia* |  |  | *senegalensis* (Lam.) Loes. |
| *Heteromorpha* |  |  | *arborescens* (Spreng.) Cham. & Schldtl. |
| *Hibiscus* |  |  | *dongolensis* Del., *micranthus* L.f. |
| *Hoslundia* |  |  | *opposita* Vahl |
| *Indigofera* |  |  | *ormocarpoides* Bak., *setiflora* Bak., *subulata* Poir., sp. cf. *lupatana* Bak.f. |
| *Ipomoea* |  |  | *shirambensis* Bak., *shupangensis* Bak., sp. cf. *mauritiana* Jacq., sp. cf. *richardsiae* Verdc. |
| *Jasminum* |  |  | *stenolobum* Rolfe |
| *Julbernardia* |  |  | *globiflora* (Benth.) Troupin |
| *Kirkia* |  |  | *acuminata* Oliv. |
| *Maerua* |  |  | *angolensis* DC., *juncea* Pax |
| *Manilkara* |  |  | *mochisia* (Bak.) Dubard |
| *Margaritaria* |  |  | *discoidea* (Baill.) G.L.Webster |
| *Markhamia* |  |  | *zanzibarica* (DC.) K.Schum. |
| *Mundulea* |  |  | *sericea* (Willd.) A.Chev. |
| *Olax* |  |  | *dissitiflora* Oliv. |
| *Oliverella* |  |  | *rubroviridis* Tieg. |
| *Ozoroa* |  |  | *insignis* Del. |
| *Peltophorum* |  |  | *africanum* Sond. |
| *Pericopsis* |  |  | *angolensis* (Bak.) Meeuwen |
| *Piliostigma* |  |  | *thonningii* (Schumach.) Milne-Redh. |
| *Plectranthus* |  |  | *esculentus* N.E.Br*.* |
| *Pleurostylia* |  |  | *africana* Loes. |
| *Plumbago* |  |  | *zeylanica* L. |
| *Polysphaeria* |  |  | sp. cf. *pedunculata* K.Schum. |
| *Pouzolzia* |  |  | *mixta* Solms-Laub. |
| *Pteleopsis* |  |  | *anisoptera* (Laws.) Engl. & Diels |
| *Ruellia* |  |  | *cordata* Thunb. |
| *Sclerocarya* |  |  | *birrea* (A.Rich.) Hochst. |
| *Senna* |  |  | *singueana* (Del.) Lock |
| *Sphenostylis* |  |  | *erecta* (Bak.f.) Bak.f. |
| *Sterculia* |  |  | *africana* (Lour.) Fiori |
| *Stomatostemma* |  |  | *monteiroae* (Oliv.) N.E.Br. |
| *Tapinanthus* |  |  | *dependens* (Engl.) Danser |
| *Tephrosia* |  |  | *longipes* Meisn. |
| *Tinnea* |  |  | *zambesiaca* Bak. |
| *Tricalysia* |  |  | *allenii* (Stapf) Brenan |
| *Turbina* |  |  | *holubii* Bak. |
| *Vangueria* |  |  | *infausta* Burch. |
| *Vernonia* |  |  | *amygdalina* Del., *glaberrima* O.Hoffm., *suprafastigiata* Klatt |
| *Xeroderris* |  |  | *stuhlmannii* (Taub.) Mendonça & E.P.Sousa |
| *Xerophyta* |  |  | *equisetoides* Bak., *humilis* (Bak.) T.Durand & Schinz |
| *Zanha* |  |  | *africana* (Radlk.) Exell |
| *Zanthoxylum* |  |  | *chalybeum* Engl. |
| *Ziziphus* |  |  | *mucronata* Willd. |

**Primary consumer tier,** butterflies (Lepidoptera, superfamilies Hesperioidea and Papilionoidea)

|  | Both sites | 0.5ha site only | 26ha site only |
| --- | --- | --- | --- |
| *Abantis* | *paradisea* (B.), *tettensis* Hop. |  | *venosa* T., *vidua* Wey., *zambesiaca* (West.) |
| *Acada* | *biseriata* (M.) |  |  |
| *Acraea* | *acara* Hew., *aglaonice* West., *anemosa* Hew., *atergatis* West.*, atolmis* West., *caldarena* Hew., *lygus* Druce, *natalica* Boisd., *neobule* Dbl., *serena* (F.) |  | *encedon* (L.), *stenobea* Wall. |
| *Andronymus* | *neander* (Pl.) |  |  |
| *Anthene* | *amarah* (Guér.), *lunulata* (T.) |  |  |
| *Axiocerses* | *amanga* (West.), *bambana* S. |  |  |
| *Azanus* | *jesous* (Guér.), *moriqua* (Wall.) |  | *ubaldus* (Stoll) |
| *Belenois* | *aurota* (F.), *creona* (Cr.) |  | *gidica* (Gt.) |
| *Bicyclus* | *anynana* (B.) |  |  |
| *Borbo* | *fatuellus* (Hop.), *gemella* (M.), *holtzii* (Pl.) |  | *borbonica* (Boisd.) |
| *Byblia* | *anvatara* (Boisd.) |  | *ilithyia* Dr. |
| *Cacyreus* |  | *lingeus* (Stoll) | *virilis* Stempffer |
| *Caprona* | *pillaana* Wall. |  |  |
| *Catopsilia* | *florella* (F.) |  |  |
| *Charaxes* | *achaemenes* Fld., *bohemani* Fld., *guderiana* (D.), *phaeus* Hew., *saturnus* B., *varane*s (Cr.) | *brutus* (Cr.), *candiope* (Gt.) | *zoolina* (West.), sp. cf. *vansoni* v. Som. |
| *Chilades* | *trochilus* (Freyer) |  |  |
| *Coeliades* | *forestan* (Stoll), *pisistratus* (F.) |  |  |
| *Colotis* | *antevippe* (Boisd.), *dissociatus* (B.), *eris* (Klug), *evagore* (Klug), *evippe* (L.), *ione* (Gt.) |  | *agoye* (Wall.), *celimene* (Lucas), *danae* (F.), *pallene* (Hop.), *regina* (T.), *vesta* (Reiche) |
| *Danaus* | *chrysippus* (L.) |  |  |
| *Eronia* | *leda* (Boisd.) |  |  |
| *Euchrysops* | *malathana* (Boisd.), *osiris* (Hop.) |  |  |
| *Eurema* | *hecabe* (L.) |  | *brigitta* (Stoll) |
| *Eurytela* | *dryope* (Cr.) |  |  |
| *Gegenes* | *hottentota* (Latr.), *pumilio* (Hoffm.) |  |  |
| *Graphium* | *angolanus* (Goeze), *antheus* (Cr.), *leonidas* (F.) |  | *porthaon* (Hew.) |
| *Hamanumida* | *daedalus* (F.) |  |  |
| *Henotesia* | *simonsii* (B.) |  |  |
| *Hypolimnas* | *misippus* (L.) |  |  |
| *Hypolycaena* | *philippus* (F.) |  | *caeculus* (Hop.) |
| *Iolaus* | *trimeni* Wall. |  | *alienus* T., *bowkeri* T., *nasisii* (Riley), *pallene* (Wall.) |
| *Junonia* | *hierta* (F.), *natalica* (Fld.), *oenone* (L.), *orithya* (L.) |  | *artaxia* Hew. |
| *Kedestes* | *callicles* (Hew.) |  |  |
| *Lampides* | *boeticus* (L.) |  |  |
| *Leptotes*1 | sp(p). |  |  |
| *Leucochitonea* | *levubu* Wall. |  |  |
| *Melanitis* | *leda* (L.) |  |  |
| *Mylothris* | *agathina* (Cr.), *rueppellii* (Koch) |  |  |
| *Neptis* | sp. cf. *alta* Ovlt. | *saclava* (Boisd.) |  |
| *Papilio* | *demodocus* Esper |  |  |
| *Parosmodes* | *morantii* (T.) |  |  |
| *Pelopidas* | *mathias* (F.) |  | *thrax* (Hüb.) |
| *Phalanta* | *phalantha* (Dr.) |  |  |
| *Pilodeudorix* | *caerulea* Druce |  |  |
| *Pinacopteryx* | *eriphia* (Gt.) |  |  |
| *Precis* | *antilope* (Feisth.), *octavia* (Cr.) |  |  |
| *Protogoniomorpha* | *anacardii* (T.) | *parhassus* (Dr.) |  |
| *Pseudonacaduba* | *sichela* (Wall.) |  |  |
| *Sarangesa* | *lucidella* (M.), *phidyle* (Walk.), *seineri* Str. | *motozi* (Wall.) |  |
| *Spialia* | *spio* (L.) |  | *colotes* (Druce), *delagoae* (T.) |
| *Spindasis* | *natalensis* (West.) |  | *phanes* (T.) |
| *Tagiades* | *flesus* (F.) |  |  |
| *Teniorhinus* | *harona* (West.) |  |  |
| *Vanessa* | *cardui* (L.) |  |  |
| *Virachola* | *antalus* (Hop.), *dinochares* S., *diocles* Hew. |  |  |
| *Ypthima* | sp. cf. *rhodesiana* Carcasson |  |  |
| *Zizeeria* | *knysna* (T.) |  |  |
| *Zizula* | *hylax* (F.) |  |  |
| *Aloeides* |  | *molomo* (T.) |  |
| *Leptosia* |  | *alcesta* (Stoll) |  |
| *Platylesches* |  | *moritili* (Wall.) |  |
| *Sevenia* |  | *trimeni* (Aur.) |  |
| *Actizera* |  |  | *lucida* (T.) |
| *Appias* |  |  | *epaphia* (Cr.) |
| *Calleagris* |  |  | *jamesoni* (Sh.) |
| *Coenyropsis* |  |  | *bera* (Hew.) |
| *Crudaria* |  |  | *leroma* (Wall.) |
| *Cupidopsis* |  |  | *iobates* (Hop.) |
| *Eicochrysops* |  |  | *hippocrates* (F.), *mahallakoaena* (Wall.) |
| *Gomalia* |  |  | *elma* (T.) |
| *Lepidochrysops* |  |  | *glauca* (T.), *longifalces* Tite, *plebeia* (B.), sp. cf. *pampolis* (Druce) |
| *Myrina* |  |  | *silenus* (F.) |
| *Nepheronia* |  |  | *thalassina* (Boisd.) |
| *Tarucus* |  |  | *sybaris* (Hop.) |
| *Tuxentius* |  |  | *calice* (Hop.) |
| *Zintha* |  |  | *hintza* (T.) |

1. A compact homogeneous distinctive genus. As many as 4 sibling species may occur on the same ground.

**Secondary consumer tier, insectivorous birds (Aves, various orders and families)**

|  | Both sites | 0.5ha site only | 26ha site only |
| --- | --- | --- | --- |
| *Anaplectes* | *melanotis* (Lafr.) |  |  |
| *Anomalospiza* | *imberbis* (Cab.) |  |  |
| *Apus* | *affinis* (Gray), *barbatus* (Scl.) |  |  |
| *Batis* | *molitor* (H.&K.) |  |  |
| *Bradornis* | *pallidus* (Mül.) |  |  |
| *Camaroptera* | *brachyura* (Vt.) | *undosa* (Reich.) |  |
| *Campethera* | *abingoni* (Sm.) | *bennettii* (Sm.) |  |
| *Centropus* |  | *superciliosus* H.&E. | *senegalensis* (L.) |
| *Chlorocichla* | *flaviventris* (Sm.) |  |  |
| *Chrysococcyx* | *caprius* (Bod.), *klaas* (Ste.) |  |  |
| *Cinnyricinclus* | *leucogaster* (Bod.) |  |  |
| *Cisticola* | *chiniana* (Sm.), *fulvicapilla* (Vt.) |  | *juncidis* (Raf.) |
| *Clamator* | *glandarius* (L.), *jacobinus* (Bod.), *levaillantii* (Sw.) |  |  |
| *Coracias* | *caudatus* L., *naevius* Daud. |  |  |
| *Corvus* | *albus* (Mül.) |  |  |
| *Creatophora* | *cinerea* (Meus.) |  |  |
| *Cuculus* | *clamosus* Lath., *gularis* Ste. | *solitarius* Ste. |  |
| *Cypsiurus* | *parvus* (Licht.) |  |  |
| *Dendropicos* | *fuscescens* (Vt.) |  |  |
| *Dicrurus* | *adsimilis* (Bech.) |  |  |
| *Dryoscopus* | *cubla* (Shaw) |  |  |
| *Emberiza* | *flaviventris* Ste. |  | *tahapisi* Ste. |
| *Eremomela* | *icteropygialis* (Lafr.) |  |  |
| *Erythropygia* | *leucophrys* (Rüp.) |  | *quadrivirgata* (Reich.) |
| *Euplectes* | *albonotatus* (Cas.) | *capensis* (L.), *orix* (L.) |  |
| *Francolinus* | *swainsonii* (Sm.) |  | *shelleyi* (O.-G.) |
| *Hirundo* | *abyssinica* (Guér.) | *smithii* Leach | *semirufa* Sund. |
| *Indicator* | *minor* Ste. |  | *indicator* (Sparr.) |
| *Lagonosticta* | *rhodopareia* (Heug.), *senegala* (L.) |  |  |
| *Laniarius* | *aethiopicus* (Gmel.) |  |  |
| *Malaconotus* | *blanchoti* (Ste.), *sulfureopectus* (Les.) |  |  |
| *Merops* | *hirundineus* Licht., *nubicoides* D.&P., *pusillus* Mül. |  |  |
| *Nectarinia* | *amethystina* (Shaw), *bifasciata* (Shaw), *senegalensis* (L.), *talatala* (Sm.) | *mariquensis* (Sm.) |  |
| *Nilaus* | *afer* (Lath.) |  |  |
| *Numida* | *meleagris* (L.) |  |  |
| *Oriolus* | *auratus* (Vt.), *larvatus* Licht. |  |  |
| *Parus* | *niger* Vt. |  |  |
| *Passer* | *diffusus* (Sm.) |  |  |
| *Petronia* | *superciliaris* (Blyth) |  |  |
| *Phoeniculus* | *purpureus* (Miller) |  |  |
| *Ploceus* | *velatus* Vt. |  |  |
| *Pogoniulus* | *chrysoconus* (Tem.) |  |  |
| *Prinia* | *subflava* (Gmel.) |  |  |
| *Pycnonotus* | *barbatus* (Desf.) |  |  |
| *Pytilia* | *afra* (Gmel.), *melba* (L.) |  |  |
| *Quelea* | *quelea* (L.) |  |  |
| *Serinus* | *mozambicus* (Mül.) | *atrogularis* (Sm.) | *mennelli* (Chubb) |
| *Sylvietta* | *rufescens* (Vt.) |  |  |
| *Tchagra* | *australis* (Sm.), *senegala* (L.) |  |  |
| *Terpsiphone* | *viridis* (Mül.) |  |  |
| *Thripias* | *namaquus* (Licht.) |  |  |
| *Tockus* | *erythrorhynchus* (Tem.), *nasutus* (L.) | *bradfieldi* (Rob.) |  |
| *Turdoides* | *jardineii* (Sm.) |  |  |
| *Turdus* | *libonyana* (Sm.) |  |  |
| *Turnix* | *sylvatica* (Desf.) |  |  |
| *Upupa* | *epops* L. |  |  |
| *Uraeginthus* | *angolensis* (L.), *granatinus* (L.) |  |  |
| *Vidua* | *orientalis* Heug., *paradisea* (L.), *purpurascens* (Reich.) | *chalybeata* (Mül.), *regia* (L.) |  |
| *Zosterops* | *senegalensis* Bon. |  |  |
| *Cossypha* |  | *heuglini* Hart. |  |
| *Estrilda* |  | *astrild* (L.) |  |
| *Ispidina* |  | *picta* (Bod.) |  |
| *Lonchura* |  | *cucullata* (Sw.) |  |
| *Onychognathus* |  | *morio* (L.) |  |
| *Amandava* |  |  | *subflava* (Vt.) |
| *Anthoscopus* |  |  | *caroli* (Sh.) |
| *Anthus* |  |  | *vaalensis* Shel. |
| *Apaloderma* |  |  | *narina* (Ste.) |
| *Campephaga* |  |  | *flava* Vt. |
| *Cercomela* |  |  | *familiaris* (Ste.) |
| *Coracina* |  |  | *pectoralis* J.&S. |
| *Eremopterix* |  |  | *leucotis* (Stan.) |
| *Halcyon* |  |  | *chelicuti* (Stan.) |
| *Lybius* |  |  | *torquatus* (Dum.) |
| *Melaenornis* |  |  | *pammelaina* (Stan.) |
| *Mirafra* |  |  | *nigricans* (Sund.), *rufocinnamomea* (Salv.) |
| *Muscicapa* |  |  | *caerulescens* Neave |
| *Ortygospiza* |  |  | *atricollis* (Vt.) |
| *Phyllastrephus* |  |  | *terrestris* Sw. |
| *Prionops* |  |  | *plumatus* (Shaw), *retzii* Wahl. |
| *Prodotiscus* |  |  | *regulus* Sund. |
| *Rhinopomastus* |  |  | *cyanomelas* (Vt.) |
| *Trachyphonus* |  |  | *vaillantii* Ranz. |

**Tertiary consumer tier**, raptorial birds (Aves, orders Falconiformes and Strigiformes)

|  | Both sites | 0.5ha site only | 26ha site only |
| --- | --- | --- | --- |
| *Accipiter* | *badius* (Gmel.), *minullus* (Daud.), *ovampensis* Gurn. |  | *tachiro* (Daud.) |
| *Aquila* | *wahlbergi* Sund. |  |  |
| *Bubo* | *africanus* (Tem.) |  |  |
| *Circaetus* | *cinereus* Vt., *pectoralis* Sm. |  |  |
| *Elanus* | *caeruleus* (Desf.) |  |  |
| *Falco* | *biarmicus* Tem. |  | *dickinsoni* Scl., *peregrinus* Tun. |
| *Hieraaetus* | *ayresii* (Gurn.), *spilogaster* (Bon.) |  |  |
| *Kaupifalco* | *monogrammicus* (Tem.) |  |  |
| *Melierax* | *metabates* Heug. |  |  |
| *Micronisus* | *gabar* (Daud.) |  |  |
| *Milvus* | *migrans* (Bod.) |  |  |
| *Polyboroides* | *typus* Sm. |  |  |
| *Terathopius* | *ecaudatus* (Daud.) |  |  |
| *Polemaetus* |  |  | *bellicosus* (Daud.) |

Annex 2. Two south-central Afr savanna woodland sites: comparative biogeographic information.

‘SIA’ after a genus’s name indicates it is also recorded from S Am, Ind, and Aus, whereas ‘–’ means no record, e.g. ‘*Adenia* – IA’ indicates *Adenia* is unrecorded from S Am.

**Primary producer tier,** woody plants (trees, shrubs, subshrubs, climbers) (numerous orders and families)

Both sites

*Adenia* – IA, *Afzelia* – I –, *Allophylus* SIA, *Bauhinia* SIA, *Brachystegia* – – –, *Combretum* SIA, *Commiphora* SI –, *Diplorhynchus* – – –, *Friesodielsia* – I –, *Grewia* – IA, *Lannea* – I –, *Melhania* – IA, *Pavetta* – IA, *Pseudolachnostylis* – – –, *Pterocarpus* SI –, *Rhus* SIA, *Rhynchosia* SIA, *Rotheca* – I –, *Senegalia* SIA*, Steganotaenia* – – –, *Strychnos* SIA, *Terminalia* SIA, *Vachellia* SIA, *Ximenia* SIA. (24)

0.5ha site only

*Baikiaea* – – –, *Baphia* – – –, *Burkea* – – –, *Erythrophleum* – IA, *Ficus* SIA, *Guibourtia* S – –, *Hymenocardia* – – –, *Ochna* – I –, *Paropsia* – – –, *Psydrax* – IA, *Pygmaeothamnus* – – –, *Schinziophyton* – – –, *Securidaca* SI –, *Trichilia* SI –, *Vitex* SIA, *Xylopia* SIA. (16)

26ha site only

*Abutilon* SIA, *Actinanthella* – – –, *Agelanthus* – – –, *Albizia* SIA, *Asparagus* – IA, *Azanza* – I –, *Barleria* SIA, *Berchemia* – I –, *Bolusanthus* – – –, *Boscia* – – –, *Bridelia* – IA, *Canthium* – I –, *Carphalea* – – –, *Cassia* SIA, *Catunaregam* – I –, *Cissus* SIA, *Clerodendrum* SIA, *Colophospermum* – – –, *Coptosperma* – – –, *Crossopteryx* – – –, *Crotalaria* SIA, *Croton* SIA, *Cryptolepis* – IA, *Dalbergia* SIA, *Decorsea* – – –, *Dichrostachys* – IA, *Diospyros* SIA, *Duosperma* – – –, *Dyschoriste* SI –, *Ehretia* SIA, *Elephantorrhiza* – – –, *Erythrococca* – – –, *Erythroxylum* SIA, *Euclea* – – –, *Euphorbia* SIA, *Feretia* – – –, *Flacourtia* – IA, *Flueggia* SIA, *Gardenia* – IA, *Gymnosporia* – IA, *Heteromorpha* – – –, *Hibiscus* SIA, *Hoslundia* – – –, *Indigofera* SIA, *Ipomoea* SIA, *Jasminum* – IA, *Julbernardia* – – –, *Kirkia* – – –, *Maerua* – I –, *Manilkara* SIA, *Margaritaria* SIA, *Markhamia* – I –, *Mundulea* – I –, *Olax* – IA, *Oliverella* – – –, *Ozoroa* – – –, *Peltophorum* SIA, *Pericopsis* – – –, *Piliostigma* – IA, *Plectranthus* – IA, *Pleurostylia* – IA, *Plumbago* SIA, *Polysphaeria* – – –, *Pouzolzia* SIA, *Pteleopsis* – – –, *Ruellia* SIA, *Sclerocarya* – – –, *Senna* SIA, *Sphenostylis* – – –, *Sterculia* SIA, *Stomatostemma* – – –,  *Tapinanthus* – – –, *Tephrosia* SIA, *Tinnea* – – –, *Tricalysia* – – –, *Turbina* S – –, *Vangueria* – – –, *Vernonia* SIA, *Xeroderris* – – –, *Xerophyta* – – –, *Zanha* – – –, *Zanthoxylum* SIA, *Ziziphus* SIA. (83)

**Primary consumer tier,** butterflies (Lepidoptera, superfamilies Hesperioidea and Papilionoidea)

Both sites

*Abantis* – – –, *Acada* – – –, *Acraea* SIA, *Andronymus* – – –, *Anthene* – IA, *Axiocerses* – – –, *Azanus* – I –, *Belenois* – IA, *Bicyclus* – – –, *Borbo* – I –, *Byblia* – I –, *Cacyreus* – – –, *Caprona* – I –, *Catopsilia* – IA, *Charaxes* – IA, *Chilades* – IA, *Coeliades* – – –, *Colotis* – I –, *Danaus* SIA, *Eronia* – – –, *Euchrysops* – IA, *Eurema* SIA, *Eurytela* – – –, *Gegenes* – I –, *Graphium* – IA, *Hamanumida* – – –, *Henotesia* – – –, *Hypolimnas* – IA, *Hypolycaena* – I –, *Iolaus* – – –, *Junonia* SIA, *Kedestes* – – –, *Lampides* – IA, *Leptotes* SIA, *Leucochitonea* – – –, *Melanitis* – IA, *Mylothris* – – –, *Neptis* – IA, *Papilio* SIA, *Parosmodes* – – –, *Pelopidas* – I –, *Phalanta* – IA, *Pilodeudorix* – – –, *Pinacopteryx* – – –, *Precis* – – –, *Protogoniomorpha* – – –, *Pseudonacaduba* – – –, *Sarangesa* – I –, *Spialia* – I –, *Spindasis* – I –, *Tagiades* – I –, *Teniorhinus* – – –, *Vanessa* SIA, *Virachola* – IA, *Ypthima* – IA, *Zizeeria* – IA, *Zizula* – IA. (57)

0.5ha site only

*Aloeides* – – –, *Leptosia* – IA, *Platylesches* – – –, *Sevenia* – – –. (4)

26ha site only

*Actizera* – – –, *Appias* SIA, *Calleagris* – – –, *Coenyropsis* – – –, *Crudaria* – – –, *Cupidopsis* – – –, *Eicochrysops* – – –, *Gomalia* – I –, *Lepidochrysops* – – –, *Myrina* – – –, *Nepheronia* – – –, *Tarucus* – I –, *Tuxentius* – – –, *Zintha* – – –.(14)

Ecological note: *Alaena*, *Cnodontes*, *Deloneura*, and *Lachnocnema*, though present, were scratched because they are not attracted to flowers while the caterpillars are variously consumers of blue-green algae or other insects. Woody plants sustain adult butterflies of many genera by supplying nectar, while fermenting fruits and sap attract others. The larval host-plants of some 42 (56%) are woody. One other, *Acraea*, utilises both woody and herbaceous hosts. Few are still unknown, e.g. *Calleagris*, *Teniorhinus*.

**Secondary consumer tier,** insectivorous birds (Aves, various orders and families)

Both sites

*Anaplectes* – – –, *Anomalospiza* – – –, *Apus* – I –, *Batis* – – –, *Bradornis* – – –, *Camaroptera* – – –, *Campethera* – – –, *Centropus* – IA, *Chlorocichla* – – –, *Chrysococcyx* – – A, *Cinnyricinclus* – – –, *Cisticola* – IA, *Clamator* – I –, *Coracias* – I –, *Corvus* – IA, *Creatophora* – – –, *Cuculus* – IA, *Cypsiurus* – I –, *Dendropicos* – – –, *Dicrurus* – IA, *Dryoscopus* – – –, *Emberiza* – – –, *Eremomela* – – –, *Erythropygia* – – –, *Euplectes* – – –, *Francolinus* – I –, *Hirundo* – IA, *Indicator* – – –, *Lagonosticta* – – –, *Laniarius* – – –, *Malaconotus* – – –, *Merops* – IA, *Nectarinia* – IA, *Nilaus* – – –, *Numida* – – –, *Oriolus* – IA, *Parus* – I –, *Passer* – I –, *Petronia* – I –, *Phoeniculus* – – –, *Ploceus* – I –, *Pogoniulus* – – –, *Prinia* – I –, *Pycnonotus* – I –, *Pytilia* – – –, *Quelea* – – –, *Serinus* – – –, *Sylvietta* – – –, *Tchagra* – – –, *Terpsiphone* – I –, *Thripias* – – –, *Tockus* – – –, *Turdoides* – I –, *Turdus* SI –, *Turnix* – IA, *Upupa* – I –, *Uraeginthus* – – –, *Vidua* – – –, *Zosterops* – IA. (59)

0.5ha site only

*Cossypha* – – –, *Estrilda* – – –, *Ispidina* – – –, *Lonchura* – IA, *Onychognathus* – – –. (5)

26ha site only

*Amandava* – I –, *Anthoscopus* – – –, *Anthus* SIA, *Apaloderma* – – –, *Campephaga* – – –, *Cercomela* – I –, *Coracina* – IA, *Eremopterix* – I –, *Halcyon* – IA, *Lybius* – – –, *Melaenornis* – – –, *Mirafra* – IA, *Muscicapa* – I –, *Ortygospiza* – – –, *Phyllastrephus* – – –, *Prionops* – – –, *Prodotiscus* – – –, *Rhinopomastus* – – –, *Trachyphonus* – – –.(19)

Ecological note: These essentially vegetarian families were scratched: doves and pigeons Columbidae, sandgrouse Pteroclididae, parrots Psittacidae, go-away birds Musophagidae, and mousebirds Coliidae. So were the nocturnals, nightjars Caprimulgidae and a courser *Rhinoptilus*, and storks Ciconiidae and herons Ardeidae that forage on dry land. Probably none of these preys on butterflies. *Terpsiphone* took many imagines, as surmised from fallen detached wings of *Charaxes* and *Graphium* in the vicinity of nests and direct observation in the case of *Hypolimnas*. No information is available for other species, or for predation on pre-adult stages. 14 of the 83 genera are seed-eaters – canaries, buntings, weavers, waxbills, etc. – that rear their young on insects. Insects bulk more or less large in the diet of the rest (83%). “Trophic transgressors” included *Nectarinia* and *Zosterops*, adapted for nectar-feeding; and *Laniarius*, a plunderer of small birds’ nests including *Terpsiphone* (this study), as are some *Centropus* and *Malaconotus*. *Corvus* is an omnivorous scavenger and commensal of man.

**Tertiary consumer tier**, raptorial birds (Aves, orders Falconiformes and Strigiformes)

Both sites

*Accipiter* SIA, *Aquila* – IA, *Bubo* SI –, *Circaetus* – I –, *Elanus* SIA, *Falco* SIA, *Hieraaetus* – IA, *Kaupifalco* – – –, *Melierax* – – –, *Micronisus* – – –, *Milvus* – IA, *Polyboroides* – – –, *Terathopius* – – –.(13)

26ha site only

*Polemaetus* – – –. (1)

Ecological note: *Aviceda*, *Otus*, and *Tyto* may subsist on non-avian prey entirely1 and were scratched. Species in 8 of the 14 genera prey on birds regularly, the rest sometimes.1 Occasional “trophic transgressions” may be due to *Micronisus* or *Polemaetus*. Thus a *M*. *gabar* (Daudin) pursued, caught, de-winged and ate a large butterfly *Charaxes bohemani* Felder; a *P*. *bellicosus* (Daudin) fed on what appeared very like a fellow but lesser raptor *Melierax* *metabates* Heuglin.2

1. Brown L. 1970. *African birds of prey*. London: Collins.

2. Personal observations elsewhere.
